# Supplementary material
Source: PubMed Central journal article supplement (PMC4652106)
Supplement: JCM.01824-15_zjm999094526so1.pdf [file JCM.01824-15_zjm999094526so1.pdf]

**Supplementary Table S1. Sensitivity pattern of clinical isolates and specimens included in the study.** The table reports RIF and INH molecular pattern for MTBC isolates and MTBC-positive specimens, based on MTBDR*plus* and/or Sanger sequencing. For 4 cases, only Xpert MTB-RIF result was available (\*). Samples were made available by the members of the TM-REST, EDCTP TB CHILD Consortia, and from Hospital Universitari de Bellvitge (Spain). Phenotypic DST was also considered when available. One hundred and sixty-three specimens (83%; 47 smear-positive culture positive plus 116 smear-negative culture negative samples) were collected and directly tested on-site at the Nsambya hospital in Kampala, Uganda within the TB CHILD project. The remaining samples were tested in Supranational Reference Laboratory Milan. Ethical approval and patients' consensus were obtained for all clinical samples.

| MTB pattern (MTBDR <i>plus</i> /sequencing) |     |     |             |             |             |                                             |     |     |                                   |             |             |
|---------------------------------------------|-----|-----|-------------|-------------|-------------|---------------------------------------------|-----|-----|-----------------------------------|-------------|-------------|
| MTBC clinical isolates (N°91)               |     |     |             |             |             | MTBC direct specimens (N°80) - AFB positive |     |     |                                   |             |             |
| N°                                          | RIF | INH | <i>rpoB</i> | <i>katG</i> | <i>inhA</i> | N°                                          | RIF | INH | <i>rpoB</i>                       | <i>katG</i> | <i>inhA</i> |
| 15                                          | R   | R   | S531L       | S315T1      | WT          | 9                                           | S   | R   | WT                                | WT          | C-15T       |
| 1                                           | R   | R   | WT          | WT          | WT          | 2                                           | R   | R   | S531L                             | S315T1      | WT          |
| 5                                           | S   | R   | WT          | WT          | WT          | 1                                           | R   | R   | S531L                             | WT+S315T1   | WT          |
| 16                                          | R   | R   | S531L       | WT          | C-15T       | 6                                           | S   | R   | WT                                | WT          | WT          |
| 7                                           | R   | R   | S531L       | WT          | WT          | 2                                           | R   | R   | D516V                             | S315T1      | WT          |
| 2                                           | R   | S   | S531L       | WT          | WT          | 2                                           | R   | R   | S531L                             | WT          | WT          |
| 2                                           | R   | R   | H526D       | S315T1      | WT          | 4                                           | S   | R   | WT                                | S315T1      | WT          |
| 1                                           | R   | R   | L511P       | S315N       | WT          | 1                                           | R   | R   | S531L                             | S315T1/T2   | WT          |
| 1                                           | R   | R   | H526D       | S315R       | WT          | 1                                           | R   | R   | Q513P                             | S315T1      | WT          |
| 1                                           | R   | R   | H526Y       | S315N       | WT          | 1                                           | S   | R   | WT                                | S315N       | WT          |
| 1                                           | R   | S   | D516V       | WT          | WT          | 1                                           | R   | S   | S531L                             | WT          | WT          |
| 2                                           | R   | R   | S531L       | S315T1      | T-8A        | 1                                           | -   | -   | D516V                             | S315T1      | T-8C        |
| 1                                           | R   | R   | L530M+S531P | S315T1      | T-8C        | 16                                          | -   | -   | WT                                | WT          | WT          |
| 2                                           | R   | R   | S531L       | S315T2      | WT          | 1                                           | R   | R   | S531L                             | WT          | C-15T       |
| 3                                           | R   | R   | D516V       | S315T1      | T-8A        | 15                                          | S   | S   | WT                                | WT          | WT          |
| 1                                           | R   | R   | D516V       | S315T1      | T-8C        | 4*                                          | -   | -   | WT                                | -           | -           |
| 11                                          | S   | R   | WT          | WT          | C-15T       | 11                                          | S   | S   | -                                 | -           | -           |
| 5                                           | R   | R   | D516V       | S315T1      | WT          | 1                                           | R   | R   | Δ 518-525<br>WT, Δ 530-<br>533 WT | S315T1      | WT          |
| 5                                           | S   | R   | WT          | S315T1      | WT          | 1                                           | -   | -   | WT                                | S315T1      | WT          |
| 1                                           | R   | R   | H526D       | S315T1      | WT          |                                             |     |     |                                   |             |             |
| 3                                           | R   | R   | S531L       | S315T1      | C-15T       |                                             |     |     |                                   |             |             |
| 1                                           | R   | R   | Q513P       | S315T1      | WT          |                                             |     |     |                                   |             |             |
| 1                                           | S   | R   | WT          | S315N       | WT          |                                             |     |     |                                   |             |             |
| 2                                           | R   | R   | H526Y       | S315T1      | C-15T       |                                             |     |     |                                   |             |             |
| 1                                           | S   | S   | WT          | WT          | WT          |                                             |     |     |                                   |             |             |

**Supplementary Figure S2. VerePLEX Biosystem.** (a) The platform includes: a compact Temperature Control System (TCS) consisting of 5 independent modules for amplification and

hybridization phases, and an optical reader (OR) able to excite Cy5-tagged amplicons which allows to automatically analyze the microarray providing an user-friendly diagnostic report within few seconds by the use of a dedicated software compatible with a standard PC and (b) LabOnChip device with detailed PCR and microarray areas. (c) Microarray layout for MDR-TB detection (100 custom hybridization spots and 26 control probes).

(a)

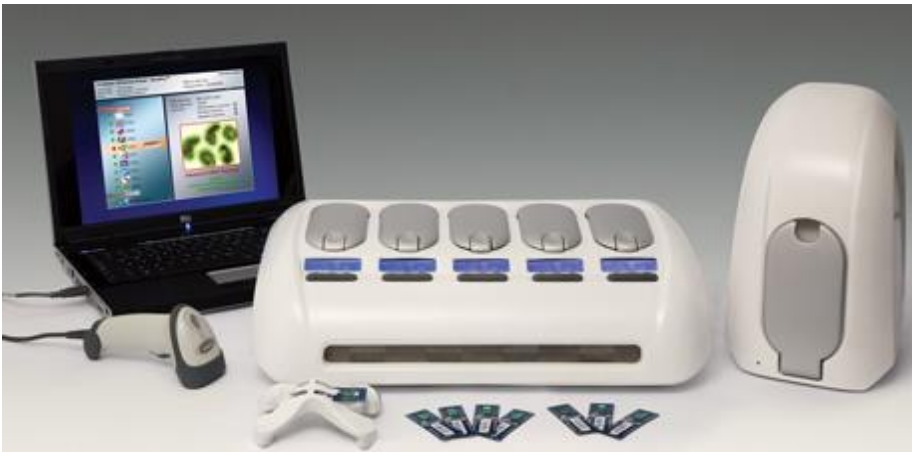

(b)

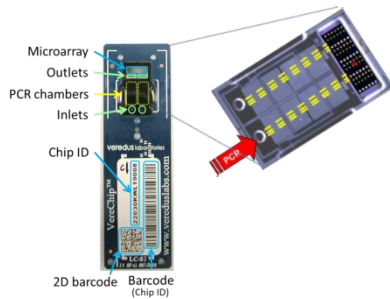

(c)

|   | 1        | 2        | 3         | 4               | 5        | 6         | 7               | 8        | 9        | 10        | 11              |
|---|----------|----------|-----------|-----------------|----------|-----------|-----------------|----------|----------|-----------|-----------------|
| 1 | AT683    | D516V_m1 | S531L_m2  | empty           | MYC4a    | MYC10a    | AT683           | AT683    | D516V_m1 | S531L_m2  | empty           |
| 2 | L511_w3a | AT730    | S315_w2   | InhA - 15C>T_m3 | AT809    | MYC17a    | MYC16a          | L511_w3a | AT730    | S315_w2   | InhA - 15C>T_m3 |
| 3 | L511P_m3 | empty    | S315T1_m2 | InhA - 8T>A_m2  | MYC5a    | AT776     | BG1             | L511P_m3 | empty    | S315T1_m2 | InhA - 8T>A_m2  |
| 4 | D516V_w5 | H526D_m2 | H526_w14  | InhA - 8T>C_m2  | MYC6a    | MYC19a    | rpoB14          | D516V_w5 | H526D_m2 | H526_w14  | InhA - 8T>C_m2  |
| 5 | AT809    | H526Y_m5 | S315T2_m1 | katG6           | rpoB9    | MYC31a    | BG2             | AT809    | H526Y_m5 | S315T2_m1 | katG6           |
| 6 | AT683    | S531L_w1 | InhA_w3   | InhA1           | MYC8a    | MYC15a    | AT683           | AT683    | S531L_w1 | InhA_w3   | InhA1           |
|   | 12       | 13       | 14        | 15              | 16       | 17        | 18              | 19       | 20       | 21        |                 |
| 1 | MYC4a    | MYC10a   | AT683     | AT683           | D516V_m1 | S531L_m2  | empty           | MYC4a    | MYC10a   | AT683     |                 |
| 2 | AT809    | MYC17a   | MYC16a    | L511_w3a        | AT730    | S315_w2   | InhA - 15C>T_m3 | AT809    | MYC17a   | MYC16a    |                 |
| 3 | MYC5a    | AT776    | BG1       | L511P_m3        | empty    | S315T1_m2 | InhA - 8T>A_m2  | MYC5a    | AT776    | BG1       |                 |
| 4 | MYC6a    | MYC19a   | rpoB14    | D516V_w5        | H526D_m2 | H526_w14  | InhA - 8T>C_m2  | MYC6a    | MYC19a   | rpoB14    |                 |
| 5 | rpoB9    | MYC31a   | BG2       | AT809           | H526Y_m5 | S315T2_m1 | katG6           | rpoB9    | MYC31a   | BG2       |                 |
| 6 | MYC8a    | MYC15a   | AT683     | AT683           | S531L_w1 | InhA_w3   | InhA1           | MYC8a    | MYC15a   | AT683     |                 |

### Supplementary Text S3.

*LoC for species identification and MDR-TB assay*

*PCR primers and probes*

Species identification: Primers for species identification were previously designed for the *orfB* of the insertion sequence *IS6110* of *M. tuberculosis* (122 bp fragment) and the 16S rRNA (235 bp in size containing hypervariable region A) genes of most relevant mycobacterial species as described in Lazzeri *et al* (26). Probes specific for the identification of MTBC, *M. avium*, *M. intracellulare*, *M. kansasii*, *M. scrofulaceum*, *M. simiae*, *M. xenopi*, *M. haemophilum*, *M. chelonae*, *M. abscessus* and *M. fortuitum* were designed.

Molecular DST (RIF and INH resistance): Fragments of *rpoB* (222 bp), *katG* (97 bp), and *inhA* (103 bp) genes as the most frequently mutated genes involved in the MDR phenotype in MTBC were amplified designing specific primers to be used on the LoC (Supplementary Table S4).

Wild-type *rpoB* hot-spot (codon 510-513, 515-518, 523-526, 530-533), *inhA* (-21/-7) and *katG* (codon 313-317), were targeted with specific probes, as well as mutations L511P (ctg/ccg), D516V

(gac/gtc) , H526Y (cac/tac), S531L (tcg/ttg) for *rpoB*, c-15t t-8a, t-8c for *inhA*, and S315T (agc/acc, agc/aca) for *katG*.

Amplification locus controls were added for the interpretation of the results (Table 1).

#### *PCR protocol*

Two different PCR Master Mixes containing water for molecular biology, PCR buffer, MgCl<sub>2</sub>, dNTPs, Taq DNA polymerase, primers for multiplex amplification of specific targets (Master Mix 1: primers for species identification, *katG* and *inhA*, Master Mix 2: primers for *rpoB*) and internal PCR controls for the confirmation of valid results were provided by the manufacturer.

Amplification protocol consists of 1 cycle at 95°C for 15 minutes to activate the DNA polymerase, 20 cycles of denaturation at 95°C for 30 s and primer annealing at 62°C for 120 s, 40 cycles of denaturation at 95°C for 10 s, primer annealing at 50°C for 10 s and extension at 72°C for 20 s, followed by a final extension at 72°C for 180 s (total time required for the amplification step including hands-on steps: 105 minutes).

#### *LoC procedure*

After preparation of the amplification mix and addition of DNA, 11.5 µL of Master Mix 1 were loaded in one inlet of the chip and 11.5 µL of Master Mix 2 in the other one, the chip was sealed with clamps and then positioned inside one Temperature Control Module (TCM), starting the PCR Program.

After the amplification step, PCR products are driven to the detection area (DA) by the use of a hybridization solution (HYB) containing hybridization controls, Phosphate Buffered Saline (PBS), Tween20 surfactant, Denhardt's solution, Salmon Sperm DNA, Sodium Chloride, formamide, Tetramethylammonium Chloride and betaine provided by the manufacturer. Thus, at the end of the PCR phase, chip was removed from the TCM to load 14.5 µL of HYB per each inlet, making the solution flow from the outlet to the DA. Chip was loaded again inside the TCM for the hybridization phase: amplicons are denaturated at 95°C for 5 minutes and hybridized on the microarray at 50°C for 30 minutes (total time required for the hybridization step including hands-on

steps: 35 minutes). LoC was recovered and transferred in a 50 mL conical tube containing the washing buffer (containing Sodium Dodecyl Sulfate 0.05%, and Saline-Sodium Citrate 0.1X) and centrifuged at 1500 g for 2 minutes and dried in an empty tube using the same settings. At the end of the drying step, the chip was analyzed with the OR, automatically generating a report based on the diagnostic rules fixed for each probe.

#### Software analysis

E@syCheck software rules for generation of a diagnostic report from the analysis of the microarray data (spot position in the layout, ON/OFF status, spot intensity/size/shape, signal mean, background signal, signal area, signal median: max 65535, background median: 257, signal standard deviation) were fixed after the evaluation of expected WT / expected MUT values from each probe (generally a probe is ON when signal median is at least three times over background median).

**Supplementary Table S4.** List of the primers used for the MDR-TB LoC. Reverse primers are Cy5-tagged.

| Primer                | Sequence (5'-3')      | Tm (°C) | Target gene   | Locus Tag   | Genome coordinates |
|-----------------------|-----------------------|---------|---------------|-------------|--------------------|
| <i>MYC1p</i>          | AGTGGCGAACGGGTGAGTAA  | 61.50   | 16S rDNA      | Rvnr01      | 1410253            |
| <i>MYC2p_cy5</i>      | CGTATCTCAGTCCCAGTGTG  | 57.40   |               |             | 1410487            |
| <i>MYC13p</i>         | GACCACCAGCACCTAACC    | 57.30   | <i>IS6110</i> | Acc. X17348 | 925187             |
| <i>MYC14p_cy5</i>     | GACCCGCCAGCCCAGGAT    | 64.20   |               |             | 925308             |
| <i>rpoB99U20</i>      | GGACGTGGAGGCGATCACAC  | 65.50   | <i>rpoB</i>   | Rv0667      | 761012             |
| <i>rpoB302L19_cy5</i> | CCGTAGTGCACGGGTGCA    | 67.60   |               |             | 761233             |
| <i>katG135U20</i>     | TGGGCTTGGGCTGGAAGAGC  | 66.10   | <i>katG</i>   | Rv1908c     | 2154519            |
| <i>katG211L21_cy5</i> | CATTTCGTCGGGGTGTTCGTC | 62.30   |               |             | 2154615            |
| <i>inhA184U21</i>     | CGCTCGTGGACATACCGATTT | 61.80   | <i>inhA</i>   | Rv1484      | 1673391            |
| <i>inhA266L21_cy5</i> | ACGGGATACGAATGGGGGTTT | 62.00   |               |             | 1673493            |

**Supplementary Table S5.** The limit of detection (LoD) of the assay for MDR-TB identification was evaluated using serial dilutions of Quantitated Bacterial DNA PCR control of MTB H37Rv (Advanced Biotechnologies Inc., Columbia, Maryland, USA) in the range of 400, 200, 120, 100, 40, 4 DNA copies/ $\mu$ L each tested at least in triplicate. The LoD was defined as the minimum DNA concentration needed to obtain positive signals from MTBC identification and WT probes spotted on the array. For each target spotted on the array the percentages of WT probes resulted ON with

standard deviation among replicates and the number of chips tested for each concentration are reported.

| Target            |                 | MTB       |        | <i>rpoB</i> |        | <i>katG</i> |        | <i>inhA</i> |        |
|-------------------|-----------------|-----------|--------|-------------|--------|-------------|--------|-------------|--------|
| Concentrations    | Chip No. tested | % ON mean | dev st | % ON mean   | dev st | % ON mean   | dev st | % ON mean   | dev st |
| 4 DNA copies/uL   | 3               | 100.00    | 0.00   | 75.00       | 36.32  | 33.33       | 57.74  | 100.00      | 0.00   |
| 40 DNA copies/uL  | 4               | 100.00    | 0.00   | 100.00      | 0.00   | 100.00      | 0.00   | 100.00      | 0.00   |
| 100 DNA copies/uL | 4               | 100.00    | 0.00   | 83.33       | 9.13   | 83.33       | 33.33  | 100.00      | 0.00   |
| 120 DNA copies/uL | 9               | 100.00    | 0.00   | 100.00      | 0.00   | 100.00      | 0.00   | 100.00      | 0.00   |
| 200 DNA copies/uL | 12              | 100.00    | 0.00   | 97.92       | 5.18   | 91.67       | 28.87  | 100.00      | 0.00   |
| 400 DNA copies/uL | 4               | 100.00    | 0.00   | 100.00      | 0.00   | 100.00      | 0.00   | 100.00      | 0.00   |

DNA hybridization to MTBC identification probes was obtained up to the concentration of 4 DNA copies/ $\mu$ L; for *katG*, *inhA* and *rpoB* targets probes positive signals were always obtained at 40 DNA copies/ $\mu$ L.
